# Supplementary material
Source: PubMed Central journal article supplement (PMC11072425)

Figure S2

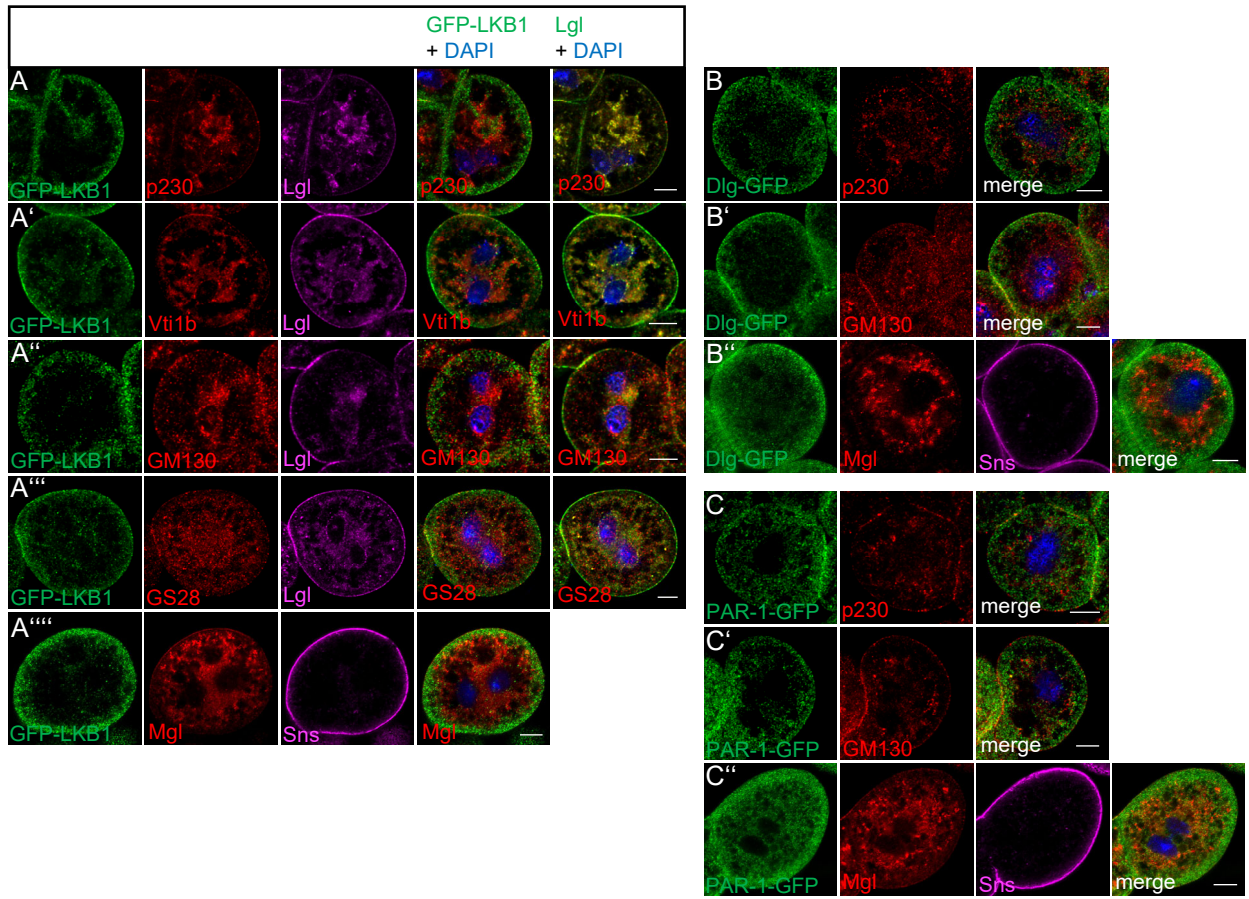

Supplement: 18_2021_3769_MOESM2_ESM.pdf [file 18_2021_3769_MOESM2_ESM.pdf]
