# Supplementary material
Source: PubMed Central journal article supplement (PMC11072425)

Figure S5

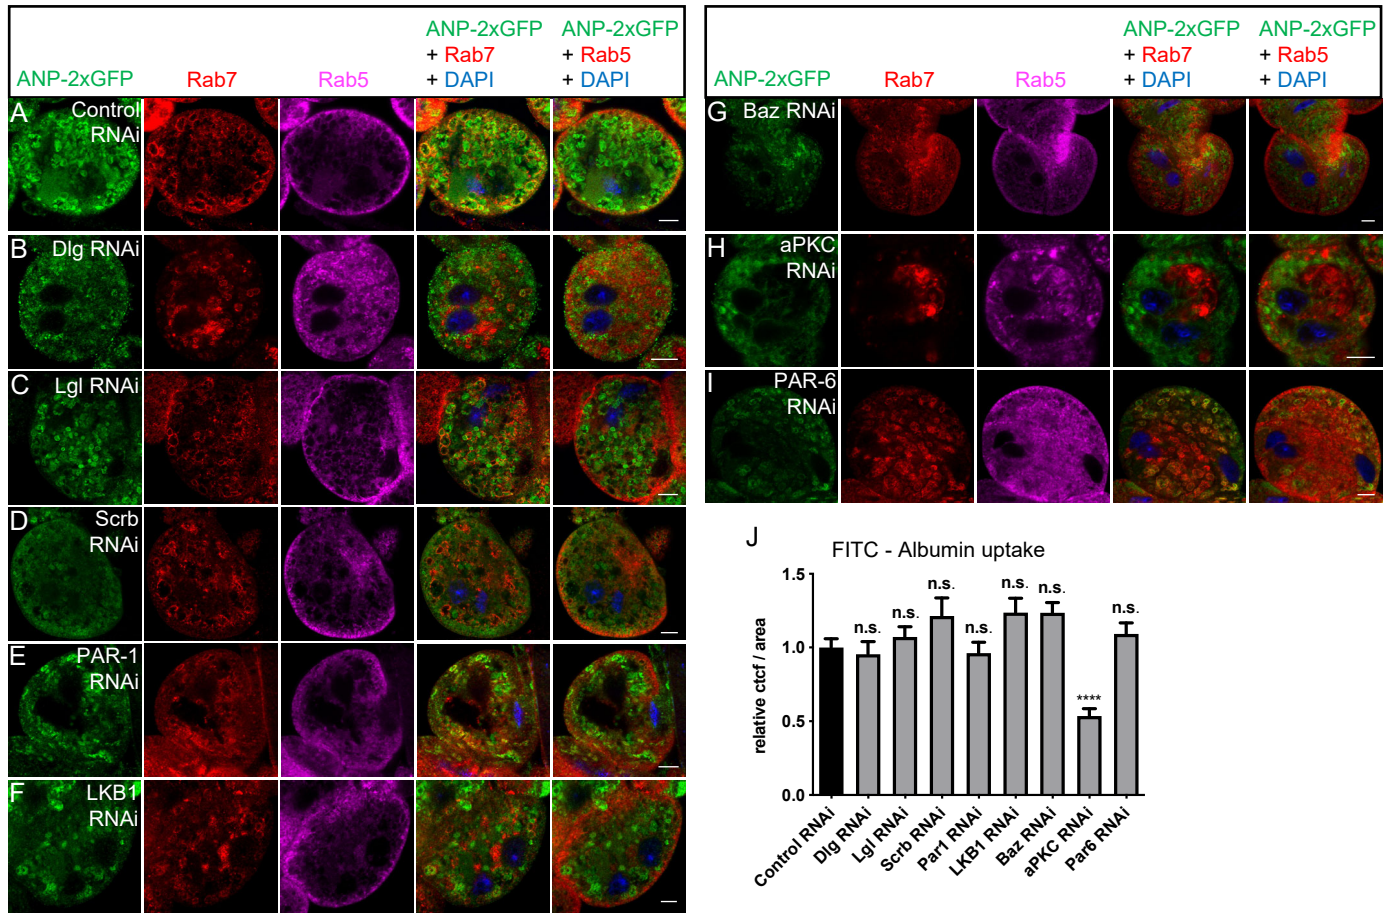

Supplement: 18_2021_3769_MOESM5_ESM.pdf [file 18_2021_3769_MOESM5_ESM.pdf]
